# Supplementary material for: Differential methylation in EGLN1 associates with blood oxygen saturation and plasma protein levels in high-altitude pulmonary edema
Source: PubMed Central journal article supplement (PMC9526282; doi:10.1186/s13148-022-01338-z), 2022-09-30
Supplement: 13148_2022_1338_MOESM1_ESM.pdf [file 13148_2022_1338_MOESM1_ESM.pdf]

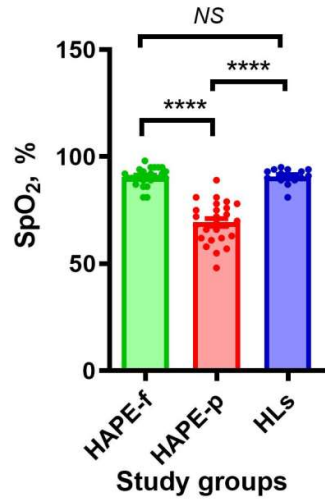

**Supplementary Figure 1.** Levels of SpO<sub>2</sub>% in HAPE-p, HAPE-f and HLs. SpO<sub>2</sub>: Blood arterial oxygen saturation level; NS: Not significant

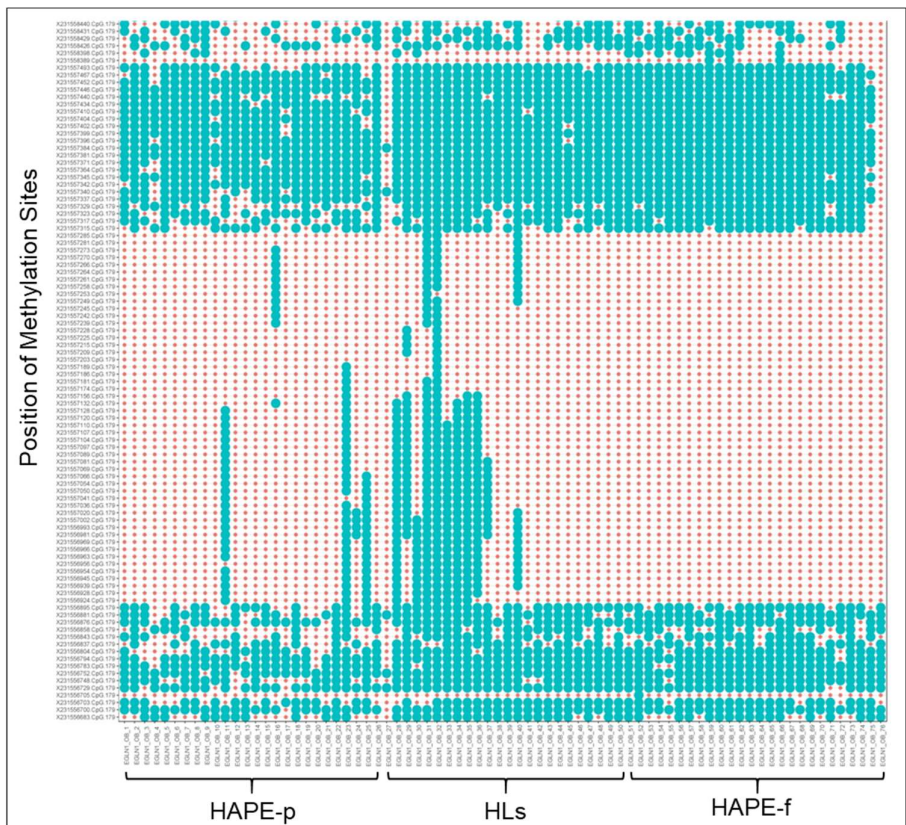

**SupplementaryFigure 2.** Dot plot of CpG methylation in *EGLN1* in the three study groups i.e. HAPE-p, HLs and HAPE-f. It revealed 97 CpG sites in *EGLN1* CpGisland 179.

- ,Un-methylated site; ● ,Methylated site.

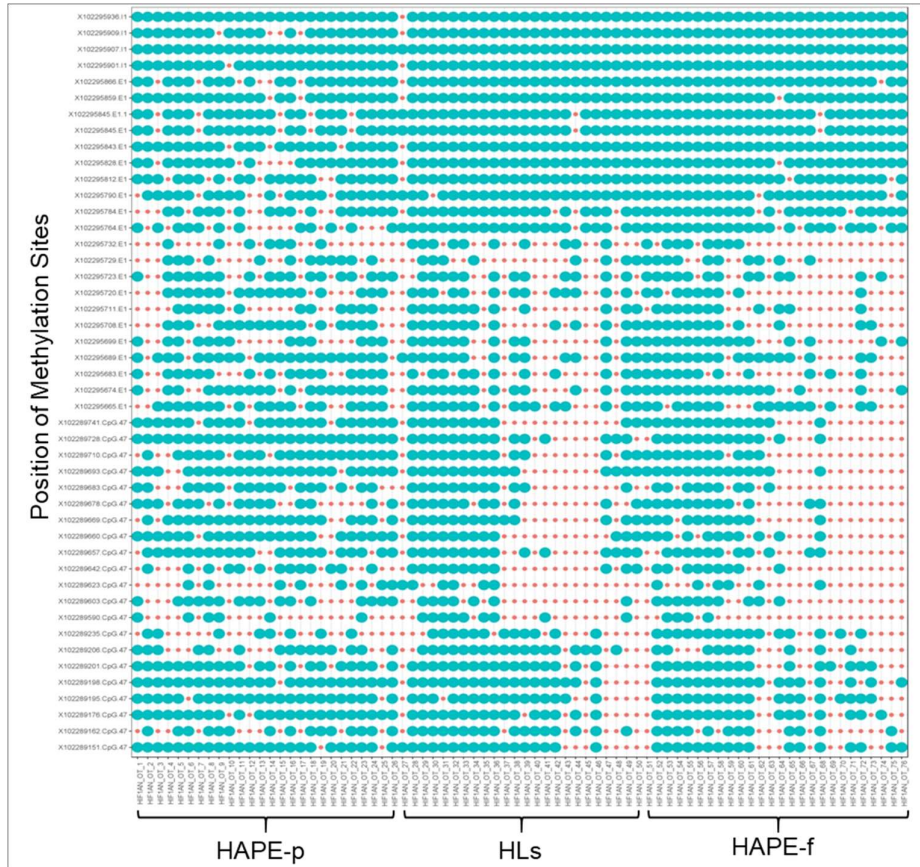

**Supplementary Figure 3.** Dot plot of CpG methylation in *HIF1AN* in the three study groups i.e. HAPE-f, HAPE-p and HLs. It revealed 46 CpG sites in *HIF1AN* CpGisland 47.

- ,Un-methylated site; ● ,Methylated site.

**Supplementary Table 1.** Methylation distribution of CpG sites of *EGLN1* and *HIF1AN* in each subject of the three study groups i.e., HAPE-f, HAPE-p and HLs.

| Subjects | <i>EGLN1</i> 5mC sites |        |       | <i>HIF1AN</i> 5mC sites |        |       |
|----------|------------------------|--------|-------|-------------------------|--------|-------|
|          | HAPE-f                 | HAPE-p | HLs   | HAPE-f                  | HAPE-p | HLs   |
| 1        | 42.27                  | 36.08  | 5.15  | 65.22                   | 67.39  | 17.39 |
| 2        | 42.27                  | 39.18  | 65.98 | 93.48                   | 65.22  | 86.96 |
| 3        | 38.14                  | 35.05  | 67.01 | 93.48                   | 52.17  | 93.48 |
| 4        | 40.21                  | 19.59  | 50.52 | 86.96                   | 69.57  | 95.65 |
| 5        | 37.11                  | 35.05  | 87.63 | 93.48                   | 82.61  | 93.48 |
| 6        | 41.24                  | 34.02  | 93.81 | 84.78                   | 82.61  | 95.65 |
| 7        | 43.30                  | 35.05  | 67.01 | 95.65                   | 67.39  | 93.48 |
| 8        | 39.18                  | 40.21  | 71.13 | 95.65                   | 86.96  | 82.61 |
| 9        | 41.24                  | 38.14  | 71.13 | 71.74                   | 86.96  | 73.91 |
| 10       | 44.33                  | 23.71  | 70.10 | 80.43                   | 54.35  | 95.65 |
| 11       | 41.24                  | 58.76  | 53.61 | 80.43                   | 76.09  | 50.00 |
| 12       | 43.30                  | 31.96  | 34.02 | 58.70                   | 63.04  | 73.91 |
| 13       | 40.21                  | 26.80  | 40.21 | 45.65                   | 65.22  | 73.91 |
| 14       | 37.11                  | 29.90  | 64.95 | 52.17                   | 67.39  | 50.00 |
| 15       | 40.21                  | 31.96  | 31.96 | 56.52                   | 63.04  | 52.17 |
| 16       | 44.33                  | 46.39  | 36.08 | 43.48                   | 84.78  | 54.35 |
| 17       | 42.27                  | 23.71  | 40.21 | 45.65                   | 69.57  | 45.65 |
| 18       | 36.08                  | 35.05  | 41.24 | 60.87                   | 82.61  | 47.83 |
| 19       | 38.14                  | 31.96  | 40.21 | 36.96                   | 73.91  | 32.61 |
| 20       | 36.08                  | 29.90  | 39.18 | 32.61                   | 52.17  | 47.83 |
| 21       | 32.99                  | 28.87  | 40.21 | 41.30                   | 67.39  | 69.57 |
| 22       | 35.05                  | 40.21  | 40.21 | 58.70                   | 76.09  | 36.96 |

|                |       |       |       |       |       |       |
|----------------|-------|-------|-------|-------|-------|-------|
| 23             | 38.14 | 70.10 | 40.21 | 43.48 | 84.78 | 78.26 |
| 24             | 36.08 | 36.08 | 41.24 | 32.61 | 84.78 | 65.22 |
| 25             | 27.84 | 47.42 |       | 30.43 | 65.22 |       |
| 26             | 13.40 | 40.21 |       | 39.13 | 69.57 |       |
| <b>Mean</b>    | 38.14 | 36.36 | 51.37 | 62.29 | 71.57 | 66.94 |
| <b>Std Dev</b> | 6.3   | 10.6  | 20.1  | 22.7  | 10.6  | 23.0  |

**Supplementary Table 2.** Real-time PCR conditions for *EGLN1* and *HIF1AN*.

| Gene          | Primer sequence                         | Cycling conditions    | Product size (bp) |
|---------------|-----------------------------------------|-----------------------|-------------------|
| <i>EGLN1</i>  | F 5'- GCT ACA AGG TAC GCA ATA ACT G-3'  | I94°C 10', D94°C 15", | 154               |
|               | R 5'- TGG ATC AAA GGC TCT AGA AGA C -3' | A60°C 60", 40 cy      |                   |
| <i>HIF1AN</i> | F 5'- TGA GTT CGT TGA GAA ACT GC -3'    | I94°C 10', D94°C 15", | 211               |
|               | R 5'- TGT CAC ATT TCC TTC CAT GC-3'     | A60°C 60", 40 cy      |                   |

F: forward; R: reverse; I: initial denaturation; D: denaturation; A: annealing; cy: cycles.

**Supplementary Table 3.** Sodium bisulfite-conversion-based methylation PCR Primers and conditions for *EGLN1* and *HIF1AN*.

| Gene           | Primer sequence                                                           | Cycling conditions                                                  | Product (bp) |
|----------------|---------------------------------------------------------------------------|---------------------------------------------------------------------|--------------|
| <i>EGLN1</i>   |                                                                           |                                                                     |              |
| HP1F<br>HP1R   | F5'-GGGAAAAAGGGTTATAGTTAAGTTATTT-3'<br>R5'-AACTCCCACATAACCAAAAACATATTC-3' | I95°C 5', D95°C 30", A58°C<br>30", E72°C 30", 38cy, FE72°C<br>10'   | 212          |
| HP2F2<br>HP2R2 | F5'-TTATTTTATTGATTTTGAGGGGTTA-3'<br>R5'-CACATAACCAAAAACATATTC-3'          | I95°C 5', D95°C 30", A59.3°C<br>30", E72°C 30", 38cy, FE72°C<br>10' | 244          |
| HP3F3<br>HP3R3 | F5'-TTTTTGGTTATGTGGGAGGTTAG-3'<br>R5'-TATCCAAAAAATAAAATAAAAAATC-3'        | I95°C 5', D95°C 30", A52.6°C<br>30", E72°C 30", 38cy, FE72°C<br>10' | 206          |
| HP4F4<br>HP4R4 | F5'-GGGATGTTTTTTGTAGTTATTGGATT-3'<br>R5'-AAACCTACCTAATTTCCCTTCTTC-3'      | I95°C 5', D95°C 30", A60°C<br>30", E72°C 30", 38cy, FE72°C<br>10'   | 260          |
| HP5F5<br>HP5R5 | F5'-TTTGTAGTTATTGGATTTTAAGATTT<br>R5'-AAACCTACCTAATTTCCCTTCTTC-3'         | I95°C 5', D95°C 30", A59.3°C<br>30", E72°C 30", 38cy, FE72°C<br>10' | 251          |
| HP6F6<br>HP6R6 | F5'-GTGGTTTTTTGGTTTTGGAGAGT-3'<br>R5'-CCCTAATCTAAAACCCTACCAATCT-3'        | I95°C 5', D95°C 30", A60°C<br>30", E72°C 30", 38cy, FE72°C<br>10'   | 259          |
| HP7F7<br>HP7R7 | F5'-TGGTTTTTTGGTTTTGGAGAGTT-3'<br>R5'-CTTCCCATAAACCTAATCTAAAAC-3'         | I95°C 5', D95°C 30", A59.3°C<br>30", E72°C 30", 38cy, FE72°C<br>10' | 269          |
| HP8F8<br>HP8R8 | F5'-TAGTGGAGTTTAGGATGTAGAGTTGATAT-3'<br>R5'-CAAAACCAAAAACCACAACCT-3'      | I95°C 5', D95°C 30", A59.3°C<br>30", E72°C 30", 38cy, FE72°C<br>10' | 250          |
|                |                                                                           |                                                                     |              |

| <i>HIF1AN</i> |                                     |                                                    |     |
|---------------|-------------------------------------|----------------------------------------------------|-----|
| EP1F1         | F5'- TTTTTTTATTGTTGTAAGGAGTATTAG-3' | <b>I95°C 5', D95°C 30", A60°C</b>                  | 231 |
| EP1R1         | R5'- CTTAACCTTTACTTTTCCCTTAACC-3'   | 30", <b>E72°C 30"</b> , 38cy, <b>FE72°C</b><br>10' |     |
| EP2F2         | F5'-TTTTTTTTATTGTTGTAAGGAGTATTAG-3' | <b>I95°C 5', D95°C 30", A56°C</b>                  | 232 |
| EP2R2         | R5'-CTTAACCTTTACTTTTCCCTTAACC-3'    | 30", <b>E72°C 30"</b> , 38cy, <b>FE72°C</b><br>10' |     |
| EP3F3         | F5'- GGGAGTTTGATTTTTGGATTAGT-3'     | <b>I95°C 5', D95°C 30", A58°C</b>                  | 176 |
| EP3R3         | R5'-ATCATAACTACTCTTCCTCCAAACC-3'    | 30", <b>E72°C 30"</b> , 38cy, <b>FE72°C</b><br>10' |     |
| EP4F4         | F5'- GGGAGTTTGATTTTTGGATTAGT-3'     | <b>I95°C 5', D95°C 30", A60°C</b>                  | 177 |
| EP4R4         | R5'-AATCATAACTACTCTTCCTCCAAACC-3'   | 30", <b>E72°C 30"</b> , 38cy, <b>FE72°C</b><br>10' |     |
| EP5F5         | F5'- TGGGTTGTTTATGAGTAGTATGGA-3'    | <b>I95°C 5', D95°C 30", A59°C</b>                  | 171 |
| EP5R5         | R5'-CTTCTCAACCTAAACAATTTCAATC-3'    | 30", <b>E72°C 30"</b> , 38cy, <b>FE72°C</b><br>10' |     |
| EP6F6         | F5'-TTGGGTTGTTTATGAGTAGTATGGA-3'    | <b>I95°C 5', D95°C 30", A57°C</b>                  | 172 |
| EP6R6         | R5'-CTTCTCAACCTAAACAATTTCAATC-3'    | 30", <b>E72°C 30"</b> , 38cy, <b>FE72°C</b><br>10' |     |
| EP7F7         | F5'-TAGTTGGTTAGTTAGAAGAGTGATT-3'    | <b>I95°C 5', D95°C 30", A59°C</b>                  | 109 |
| EP7R7         | R5'-TACTCATAAACAACCCAATAATTC-3'     | 30", <b>E72°C 30"</b> , 38cy, <b>FE72°C</b><br>10' |     |
| EP8F8         | F5'-GTAGTTGGTTAGTTAGAAGAGTGATT-3'   | <b>I95°C 5', D95°C 30", A60°C</b>                  | 110 |
| EP8R8         | R5'-TACTCATAAACAACCCAATAATTC-3'     | 30", <b>E72°C 30"</b> , 38cy, <b>FE72°C</b><br>10' |     |
| EP9F9         | F5'-CGTATATTCGCGTCGGTTTGGAG-3'      | <b>I95°C 5', D95°C 30", A55°C</b>                  | 291 |
| EP9R9         | R5'-CTACGCTCCTCCGCACTCGAC-3'        | 30", <b>E72°C 30"</b> , 38cy, <b>FE72°C</b><br>10' |     |

|       |                                 |                                                                                                             |     |
|-------|---------------------------------|-------------------------------------------------------------------------------------------------------------|-----|
| EP10F | F5'-TTCGTTTCGTTATTCGTTTGCGG-3'  | <b>I</b> 95°C 5', <b>D</b> 95°C 30", <b>A</b> 58.6°C<br>30", <b>E</b> 72°C 30", 38cy, <b>FE</b> 72°C<br>10' | 222 |
| EP10R | R5'-CGAAACCGAACCTCGACTTCTAC-3'  |                                                                                                             |     |
| EP11F | F5'-GTAGAAGTCGAGGTTTCGGTT-3'    | <b>I</b> 95°C 5', <b>D</b> 95°C 30", <b>A</b> 54.2°C<br>30", <b>E</b> 72°C 30", 38cy, <b>FE</b> 72°C<br>10' | 308 |
| EP11R | R5'-ACCTATACGACGAATAACAACCTA-3' |                                                                                                             |     |
| EP12F | F5'-AGGTTGTTATTCGTCGTATAGGTT-3' | <b>I</b> 95°C 5', <b>D</b> 95°C 30", <b>A</b> 51.7°C<br>30", <b>E</b> 72°C 30", 38cy, <b>FE</b> 72°C<br>10' | 357 |
| EP12R | R5'-ATTCTCCATCTCCCGCACAA-3'     |                                                                                                             |     |
| EP13F | F5'-AGGGTTCGGCGGTGGTTGTC-3'     | <b>I</b> 95°C 5', <b>D</b> 95°C 30", <b>A</b> 60°C<br>30", <b>E</b> 72°C 30", 38cy, <b>FE</b> 72°C<br>10'   | 199 |
| EP13R | R5'-CGACACGATATACTCGAACGCCAA-3' |                                                                                                             |     |
| EP14F | F5'-GAGTATATCGTGTCGTGTATGAA-3'  | <b>I</b> 95°C 5', <b>D</b> 95°C 30", <b>A</b> 60°C<br>30", <b>E</b> 72°C 30", 38cy, <b>FE</b> 72°C<br>10'   | 138 |
| EP14R | R5'-TAACCAACTACCCGTCGGTA-3'     |                                                                                                             |     |

F: forward; R: reverse; I: initial denaturation; D: denaturation; A: annealing; E: extension; FE: final extension; cy: cycles
